# Supplementary material for: Polyhedral Fe3O4 nanoparticles for lithium ion storage
Source: Royal Society of Chemistry journal article supplement (doi:10.1039/c4nj02032d), 2015-01-01
Supplement: c4nj02032d1.pdf [file c4nj02032d1.pdf]

Electronic Supplementary Information (ESI) for  
New Journal of Chemistry

**Polyhedral Fe<sub>3</sub>O<sub>4</sub> nanoparticles for lithium ion storage**

Chaolun Liang,<sup>ab</sup> Senchuan Huang,<sup>a</sup> Wenxia Zhao,<sup>b</sup> Wenyue Liu,<sup>a</sup> Jian Chen,<sup>b</sup>  
Hong Liu,<sup>\*c</sup> and Yexiang Tong<sup>\*a</sup>

<sup>a</sup> KLGHEI of Environment and Energy Chemistry, MOE of the Key Laboratory of Bioinorganic and Synthetic Chemistry, School of Chemistry and Chemical Engineering, Sun Yat-Sen University, Guangzhou 510275, People's Republic of China.

<sup>b</sup> Instrumental Analysis and Research Centre, Sun Yat-Sen University, Guangzhou 510275, People's Republic of China.

E-mail: chedhx@mail.sysu.edu.cn; ce04lxh@mail.sysu.edu.cn; Fax: +86-20-84112245;

Tel: +86-20-84110071

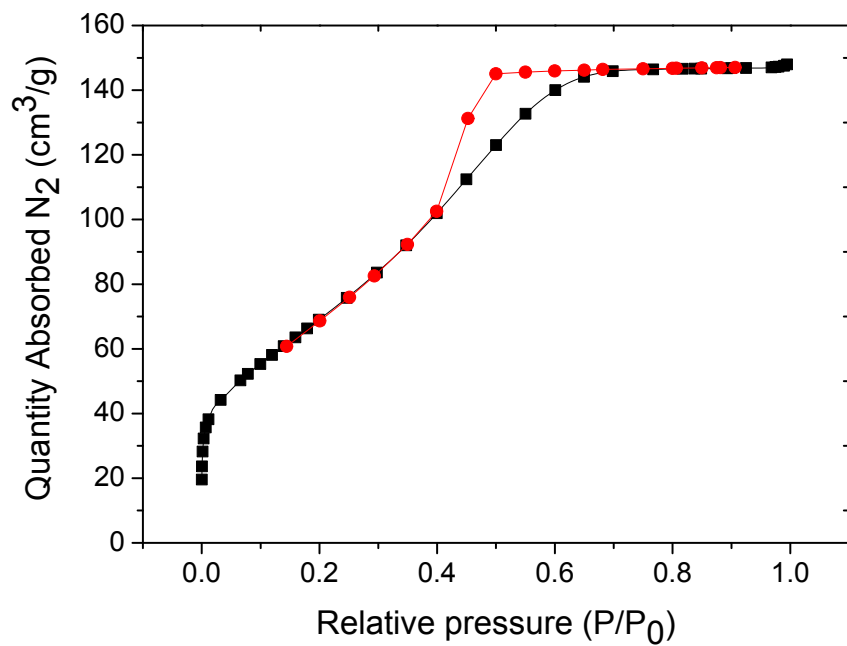

Figure S1. Nitrogen adsorption–desorption isotherms for Fe<sub>3</sub>O<sub>4</sub> nanoparticles

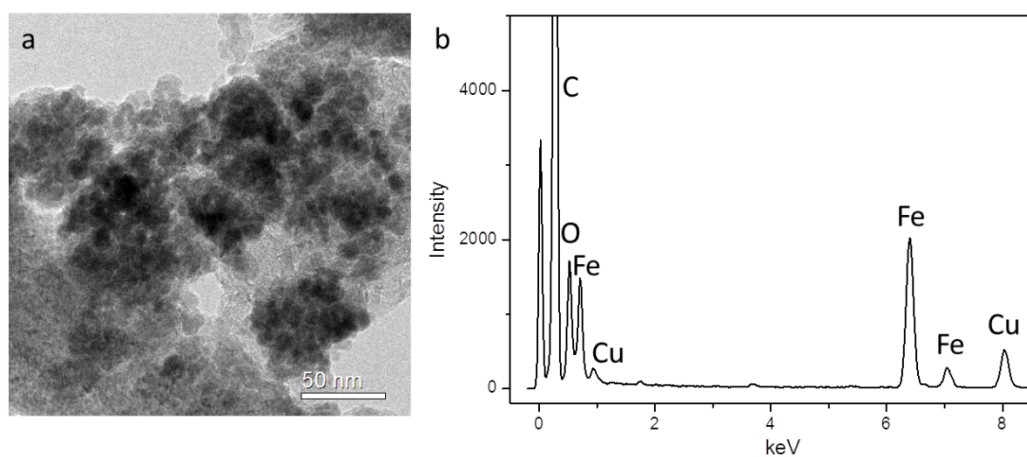

Figure S2. (a) TEM image of the Fe<sub>3</sub>O<sub>4</sub> nanoparticles after 20 cycles at 100 mA h g<sup>-1</sup>, (b) EDS spectrum of the Fe<sub>3</sub>O<sub>4</sub> nanoparticles after cycling, showing the chemical composition of the sample. Carbon and copper are from the copper grid.
